# Supplementary material
Source: Springer Nature journal article supplement (https://www.springermedizin.de/resource/supplementary/12960_2003_12_MOESM8_ESM.pdf/9569728)
Supplement: MOESM8 [file 9569728]

Number

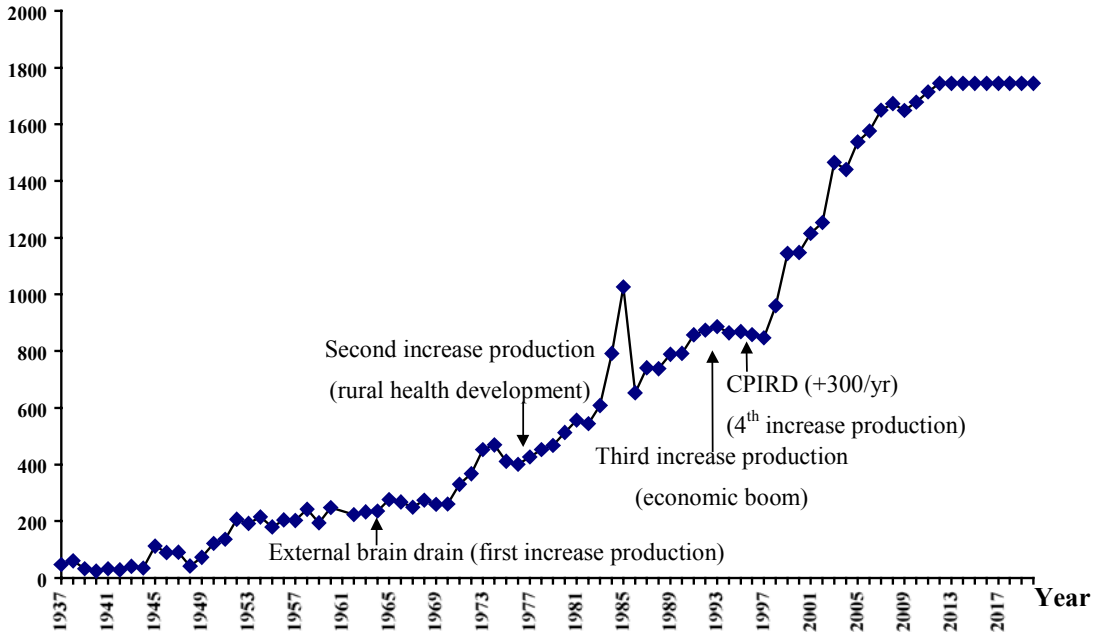

Source: Thai Medical Council

**CPIRD** = Collaborative Project to Increase Production of Rural Doctors.
